# Supplementary material for: Effects of microvirin monomers and oligomers on hepatitis C virus
Source: PubMed Central journal article supplement (PMC6434159; doi:10.1042/bsr20170015), 2017-06-30
Supplement: bsr-37-bsr20170015_Supp1.pdf [file bsr-37-bsr20170015_Supp1.pdf]

## Supplementary Information

### Effects of Microvirin Mono- and Oligomers on Hepatitis C Virus

Yuan-Qin Min, Xu-Chu Duan, Yi-Dan Zhou, Anna Kulinich, Zhi-Peng Cai, Hong-Yu

Ma, Li Liu, Xiao-Lian Zhang and Josef Voglmeir

**Supplementary Table 1** Primers used for cloning MVN and its oligomers

| Primer names    | Sequences (5' - 3')                         |
|-----------------|---------------------------------------------|
| MVN-NdeI For    | GGAATTC <u>CATATG</u> CCGAACTTCTCTCACACCTG  |
| MVN-XhoI Rev    | CCGCTCGAGACCGATTTCAGCTGAGAGTC               |
| MVN-BamHI For   | CGCGGATCCATGCCGAACTTCTCTCACACC              |
| MVN-BamHI Rev   | CGCGGATCCACCGATTTCAGCTGAGAGTC               |
| MVN-EcoRI For   | CGCGAATTCATGCCGAACTTCTCTCACACC              |
| MVN-EcoRI Rev   | CGCGAATTCACCGATTTCAGCTGAGAGTC               |
| MVN-SacI For    | CGCGAGCTCATGCCGAACTTCTCTCACACC              |
| MVN-SacI Rev    | CGCGAGCTCACCGATTTCAGCTGAGAGTC               |
| MVN-BamHI6 For  | CGCGGATCCGGCGGCATGCCGAACTTCTCTCACACC        |
| MVN-BamHI6 Rev  | CGCGGATCCGGAGCCACCGATTTCAGCTGAGAGTC         |
| MVN-EcoRI6 For  | CGCGAATTCGGCGGCATGCCGAACTTCTCTCACACC        |
| MVN-EcoRI6 Rev  | CGCGAATTCGGAGCCACCGATTTCAGCTGAGAGTC         |
| MVN-SacI6 For   | CGCGAGCTC GGCGGCATGCCGAACTTCTCTCACACC       |
| MVN-SacI6 Rev   | CGCGAGCTC GGAGCCACCGATTTCAGCTGAGAGTC        |
| MVN-BamHI10 For | CGCGGATCCGGCGGCTCCGGCATGCCGAACTTCTCTCACACC  |
| MVN-BamHI10 Rev | CGCGGATCCGCCGGAGCCGCCACCGATTTCAGCTGAGAGTC   |
| MVN-EcoRI10 For | CGCGAATTCGGCGGCTCCGGCATGCCGAACTTCTCTCACACC  |
| MVN-EcoRI10 Rev | CGCGAATTCGCCGGAGCCGCCACCGATTTCAGCTGAGAGTC   |
| MVN-SacI10 For  | CGCGAGCTC GGCGGCTCCGGCATGCCGAACTTCTCTCACACC |
| MVN-SacI10 Rev  | CGCGAGCTCGCCGGAGCCGCCACCGATTTCAGCTGAGAGTC   |
| RT-HCV Fw       | AGCCATGGCGTTAGTATGAGTGTC                    |
| RT-HCV Rv       | ACAAGGCCTTTCGCAACCCAA                       |
| RT-GAPDH Fw     | ACCACAGTCCATGCCATCAC                        |
| RT-GAPDH Rv     | TCCACCACCCTGTTGCTGTA                        |

**Supplementary Table 2** Absorbance values of the elution fractions with the highest protein contents using Ni-NTA purification.

| <b>MVN type</b>           | <b>Monomer</b> | <b>2S</b> | <b>2M</b> | <b>2L</b> | <b>3S</b> | <b>3M</b> | <b>3L</b> | <b>4S</b> | <b>4M</b> | <b>4L</b> |
|---------------------------|----------------|-----------|-----------|-----------|-----------|-----------|-----------|-----------|-----------|-----------|
| UV Absorbance<br>(280 nm) | 0.393          | 0.460     | 0.390     | 0.424     | 0.426     | 0.387     | 0.209     | 0.198     | 0.158     | 0.550     |

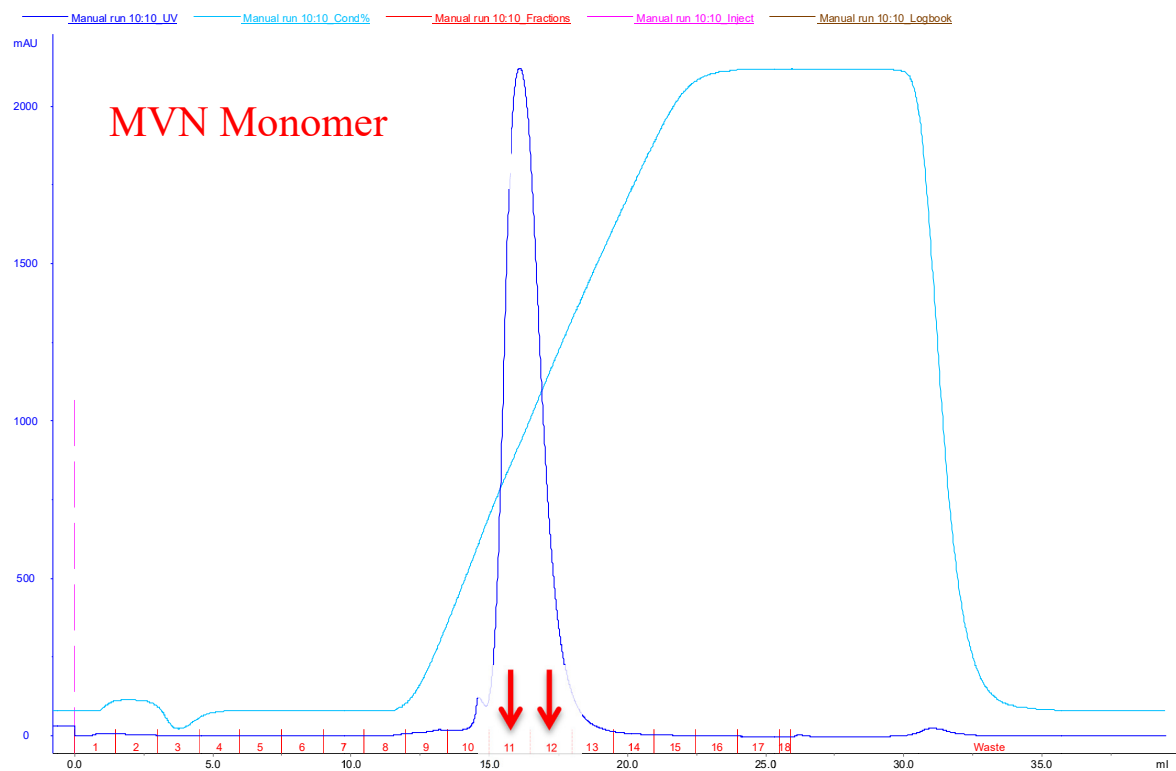

**Supplementary Figure S1** FPLC chromatogram of the Q Sepharose XL ion exchange purification of the MVN monomer. Fractions 11 and 12 (red arrow) were collected and used for further experiments.

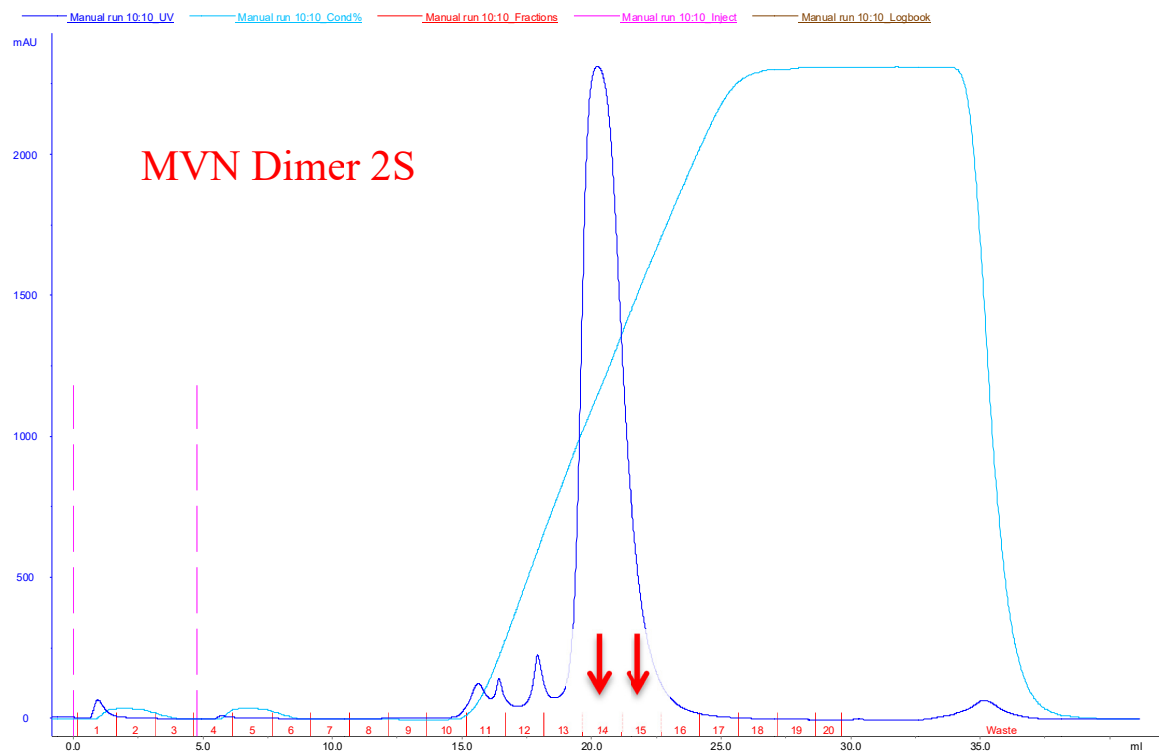

**Supplementary Figure S2** FPLC chromatogram of the Q Sepharose XL ion exchange purification of the MVN dimer 2S. Fractions 14 and 15 (red arrow) were collected and used for further experiments.

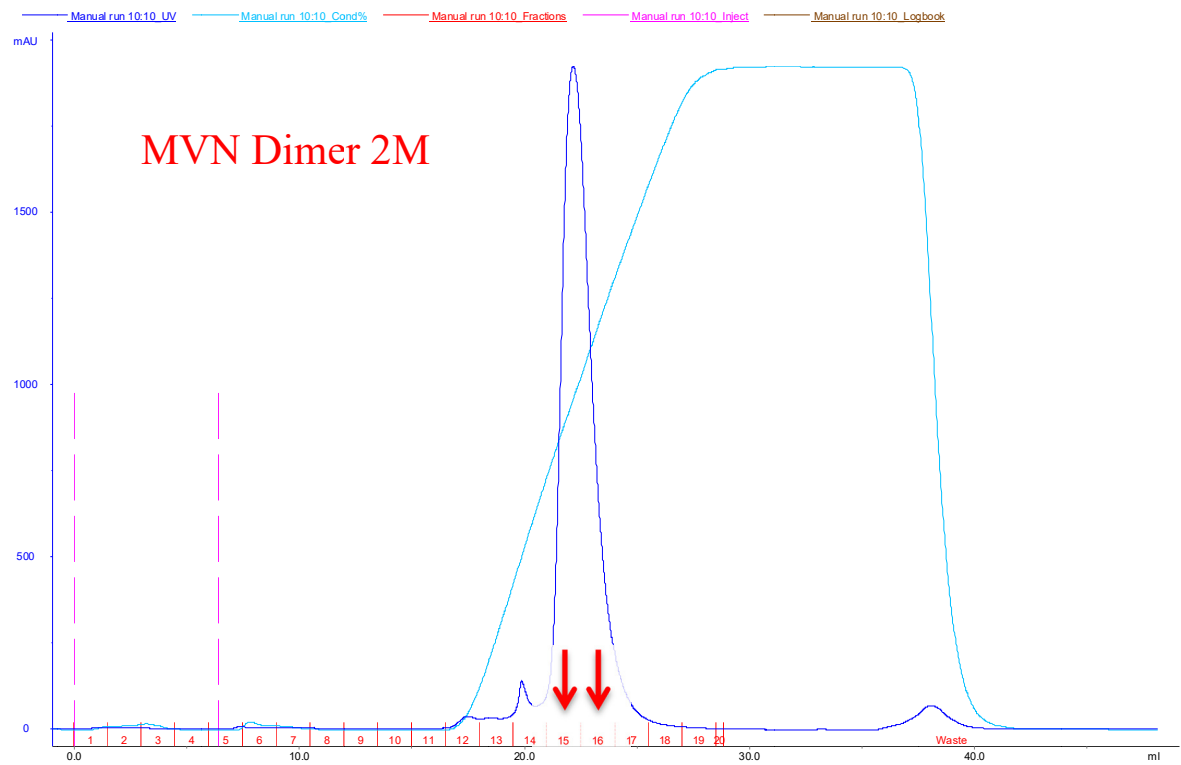

**Supplementary Figure S3** FPLC chromatogram of the Q Sepharose XL ion exchange purification of the MVN dimer 2M. Fractions 15 and 16 (red arrow) were collected and used for further experiments.

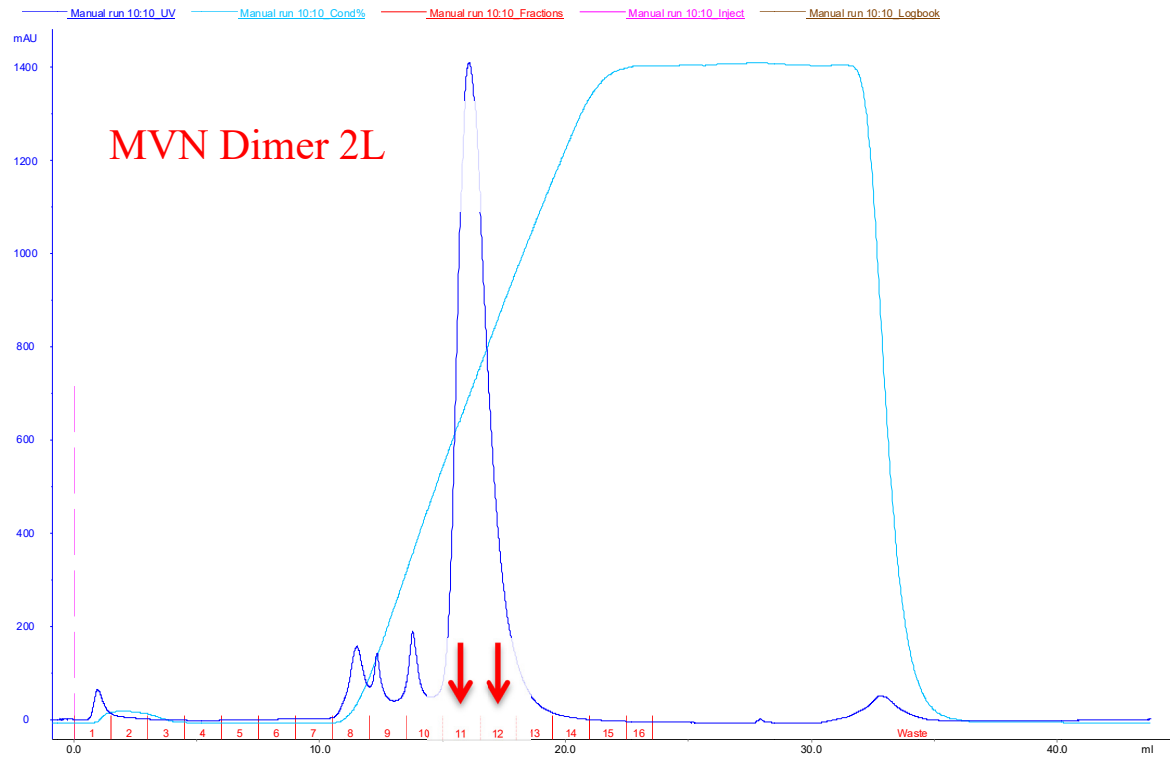

**Supplementary Figure S4** FPLC chromatogram of the Q Sepharose XL ion exchange purification of the MVN dimer 2M. Fractions 11 and 12 (red arrow) were collected and used for further experiments.

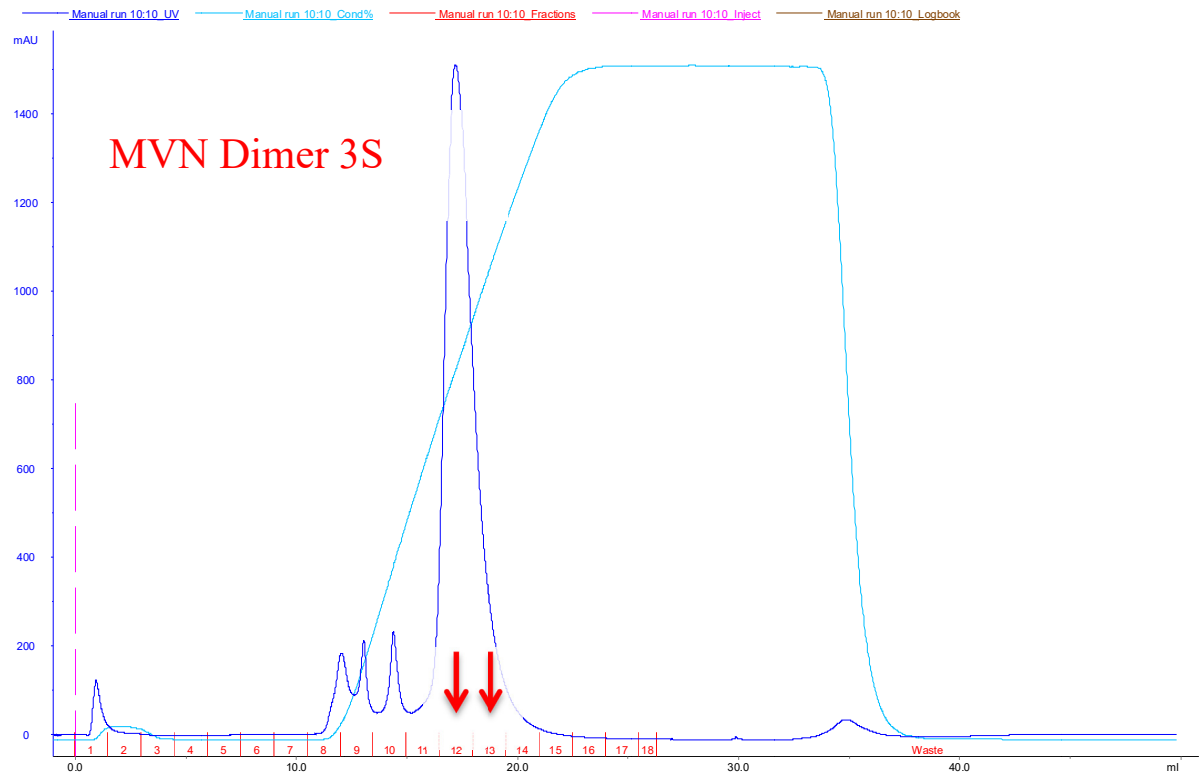

**Supplementary Figure S5** FPLC chromatogram of the Q Sepharose XL ion exchange purification of the MVN trimer 3S. Fractions 12 and 13 (red arrow) were collected and used for further experiments.

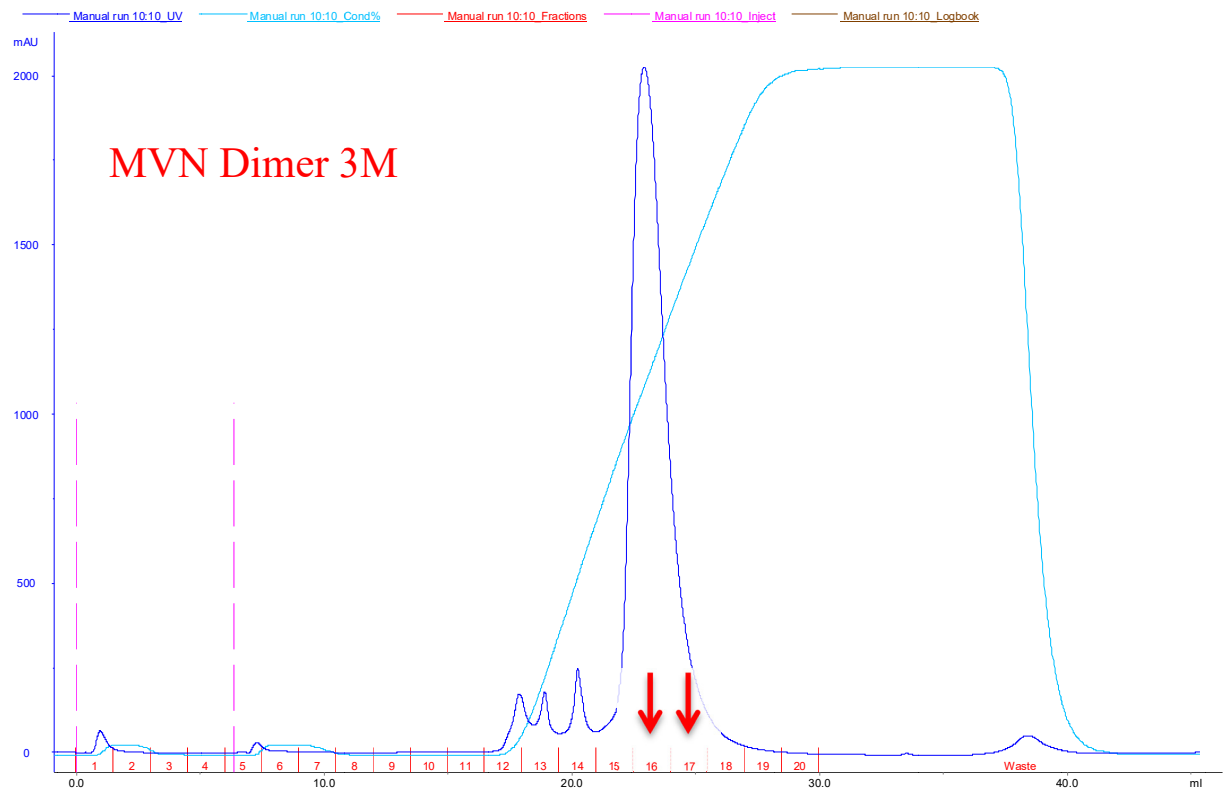

**Supplementary Figure S6** FPLC chromatogram of the Q Sepharose XL ion exchange purification of the MVN trimer 3M. Fractions 16 and 17 (red arrow) were collected and used for further experiments.



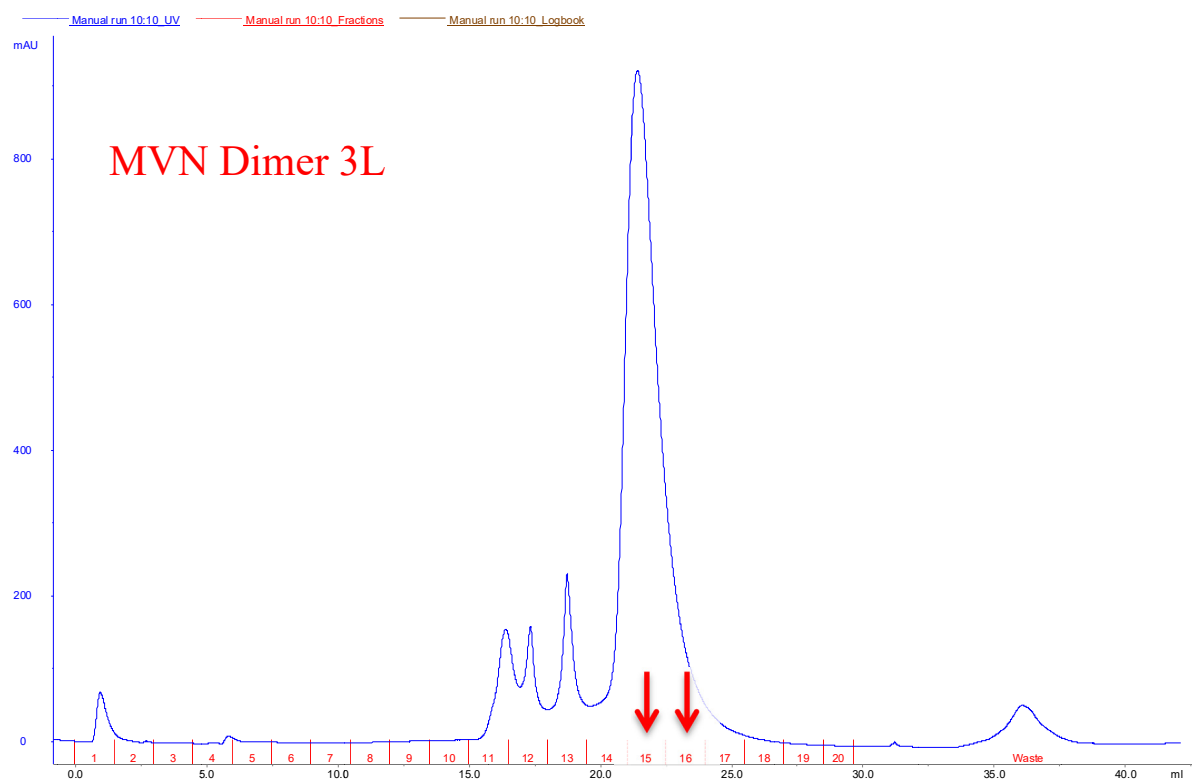

**Supplementary Figure S7** FPLC chromatogram of the Q Sepharose XL ion exchange purification of the MVN trimer 3L. Fractions 15 and 16 (red arrow) were collected and used for further experiments.

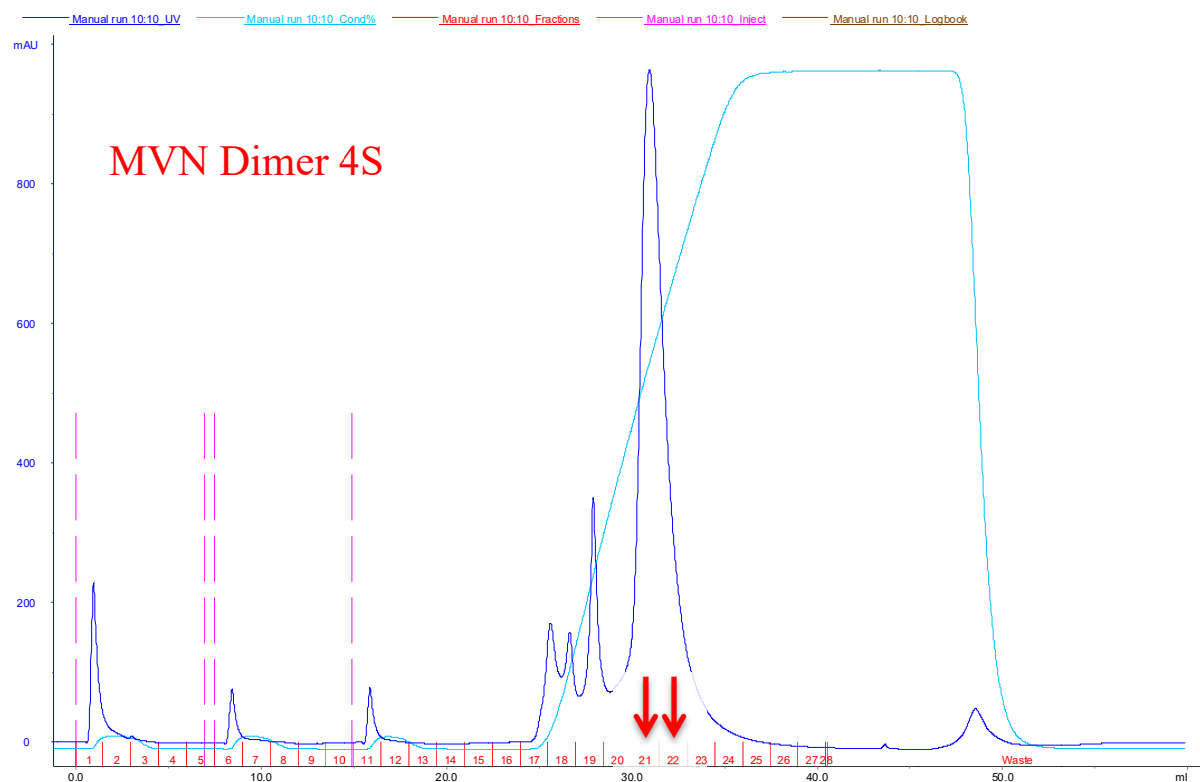

**Supplementary Figure S8** FPLC chromatogram of the Q Sepharose XL ion exchange purification of the MVN tetramer 4S. Fractions 21 and 22 (red arrow) were collected and used for further experiments.

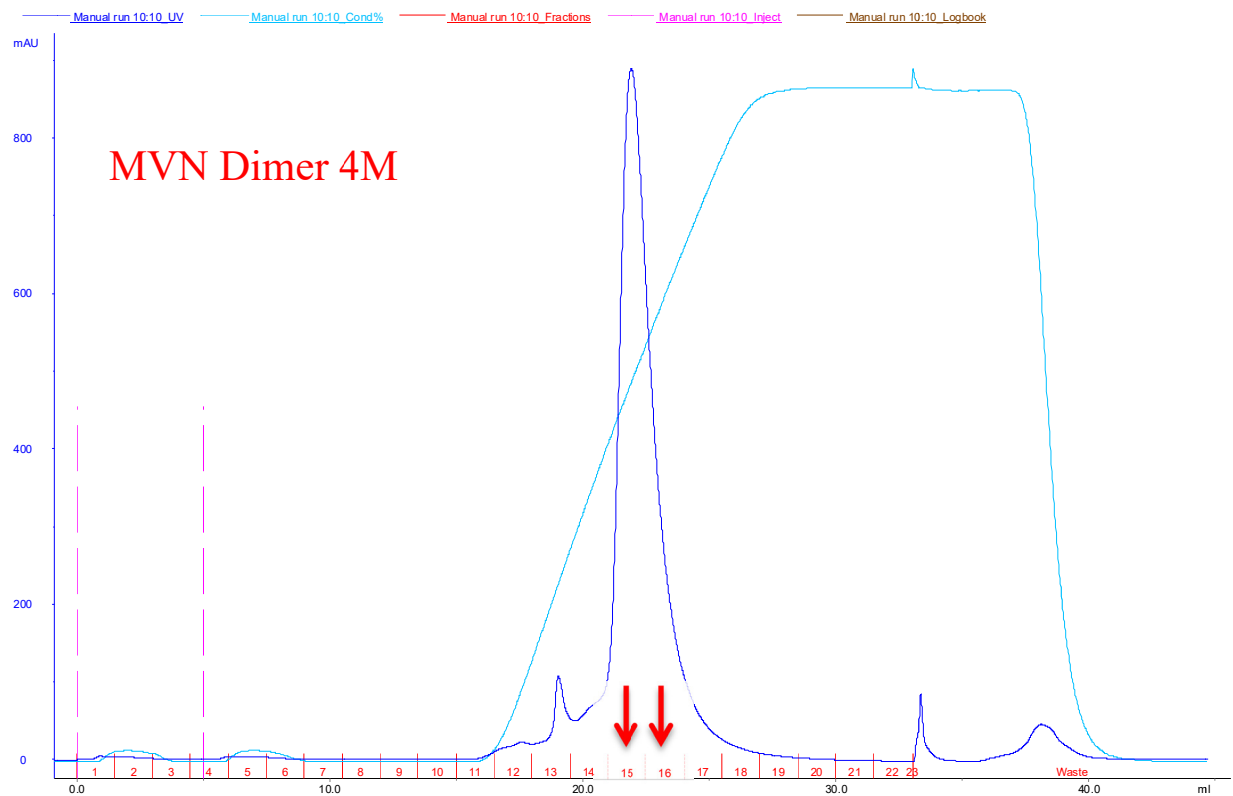

**Supplementary Figure S9** FPLC chromatogram of the Q Sepharose XL ion exchange purification of the MVN tetramer 4M. Fractions 15 and 16 (red arrow) were collected and used for further experiments.

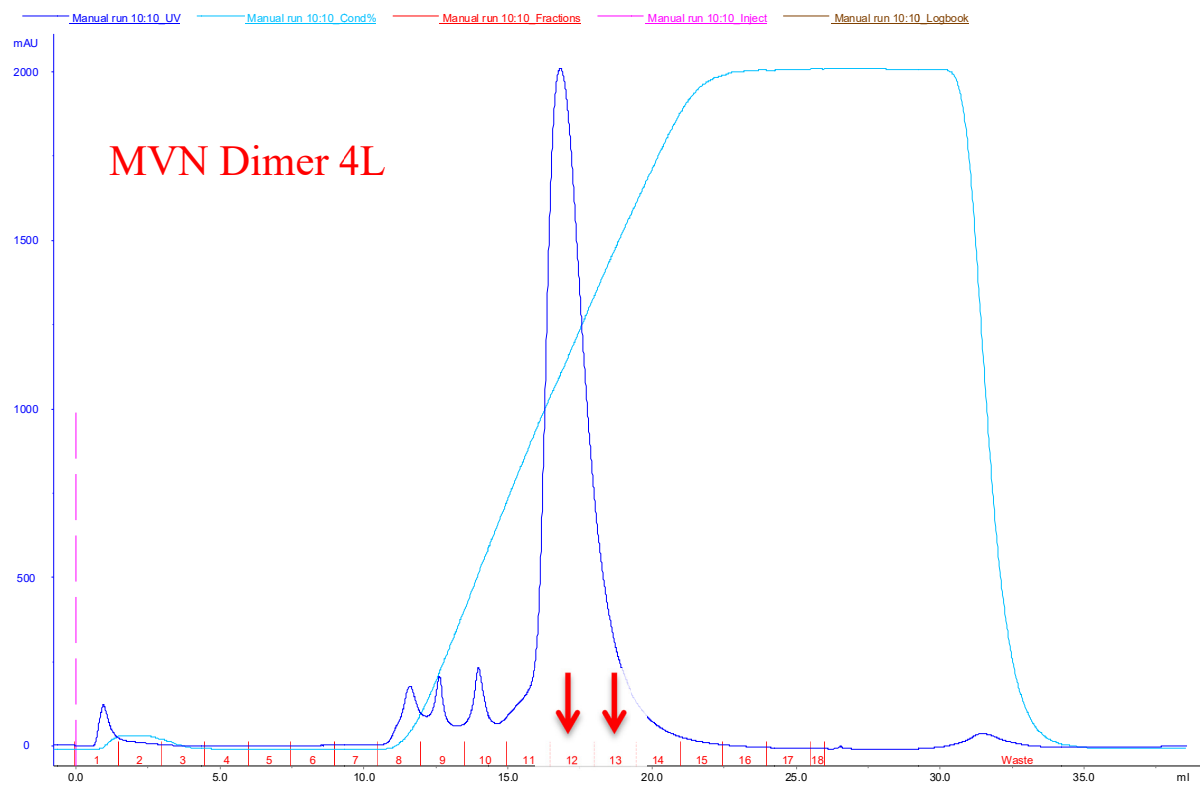

**Supplementary Figure S10** FPLC chromatogram of the Q Sepharose XL ion exchange purification of the MVN tetramer 4L. Fractions 12 and 13 (red arrow) were collected and used for further experiments.

**Supplementary Table 3** HCV N-glycan composition and possible isomers

| Retention time<br>(min) <sup>a</sup> | GU <sup>a</sup> | GU (NIBRT) <sup>b</sup> | Hex | HexNAc | Fuc | m/z <sup>c</sup> |
|--------------------------------------|-----------------|-------------------------|-----|--------|-----|------------------|
| 24.3                                 | 6.11            | 6.18±0.02               | 5   | 2      | -   | 1377.6           |
| 27.6                                 | 6.93            | 7.02±0.05               | 6   | 2      | -   | 1539.5           |
| 28.1                                 | 7.08            | 7.20±0.02               | 5   | 4      | -   | 1783.7           |
| 29.5                                 | 7.47            | 7.61±0.02               | 6   | 3      | -   | 1742.7           |
| 29.5                                 | 7.47            | 7.61±0.02               | 5   | 4      | 1   | 1929.8           |
| 31.9                                 | 8.15            | 8.38±0.04               | 6   | 5      | -   | 2148.8           |
| 32.2                                 | 8.28            | 8.33±0.00               | 6   | 4      | 1   | 2091.8           |

<sup>a</sup> Retention time and glucose unit (GU) values of 2-AB-labeled glycan species obtained by HILIC-UPLC

<sup>b</sup> The reference GU values from the National Institute for Bioprocessing Research and Training

<sup>c</sup> 2-AB-labeled glycan species ([M+Na]<sup>+</sup>) analyzed by MALDI-TOF MS/MS

Hex= hexose; HexNAc=N-acetylhexosamine; Fuc=fucose

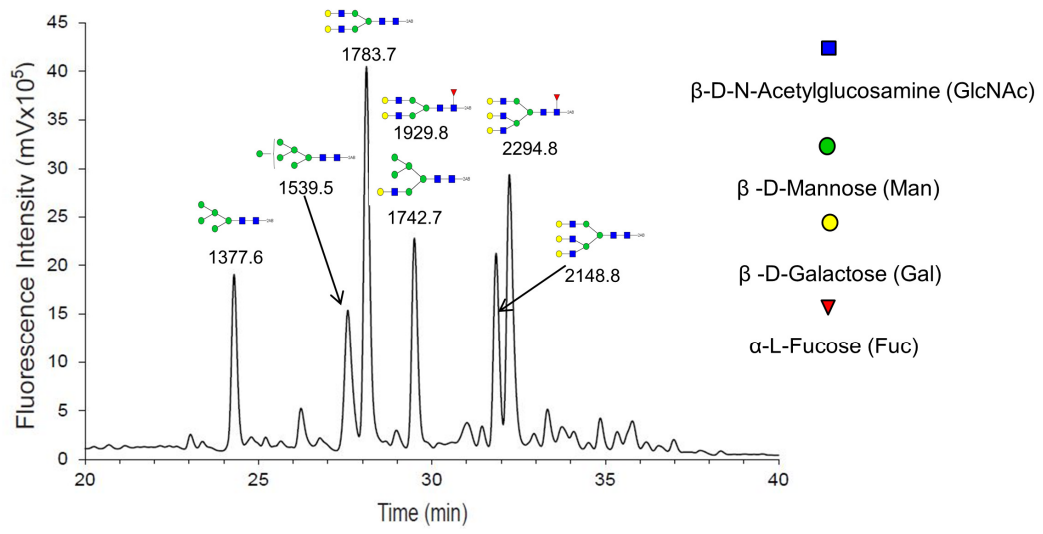

**Supplementary Figure 11** UPLC chromatogram of HCV-derived N-glycans.

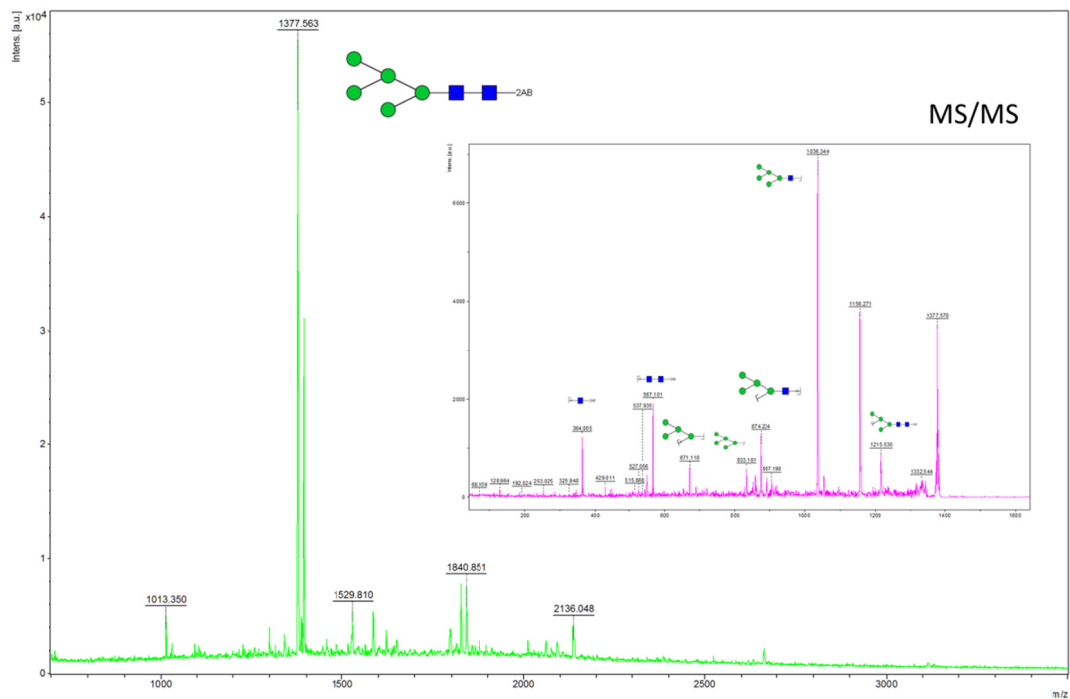

**Supplementary Figure 12** Mass spectrometric analysis of UPLC elution peak at 24.3 min.

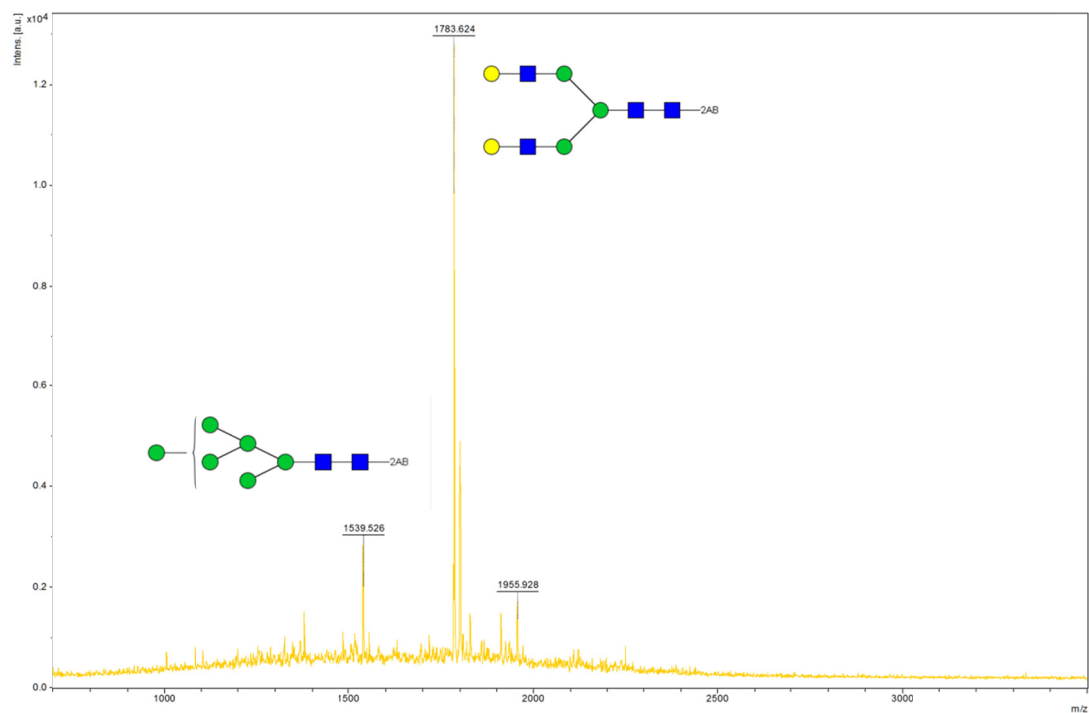

**Supplementary Figure 13** Mass spectrometric analysis of UPLC elution peak at 27.6 min.



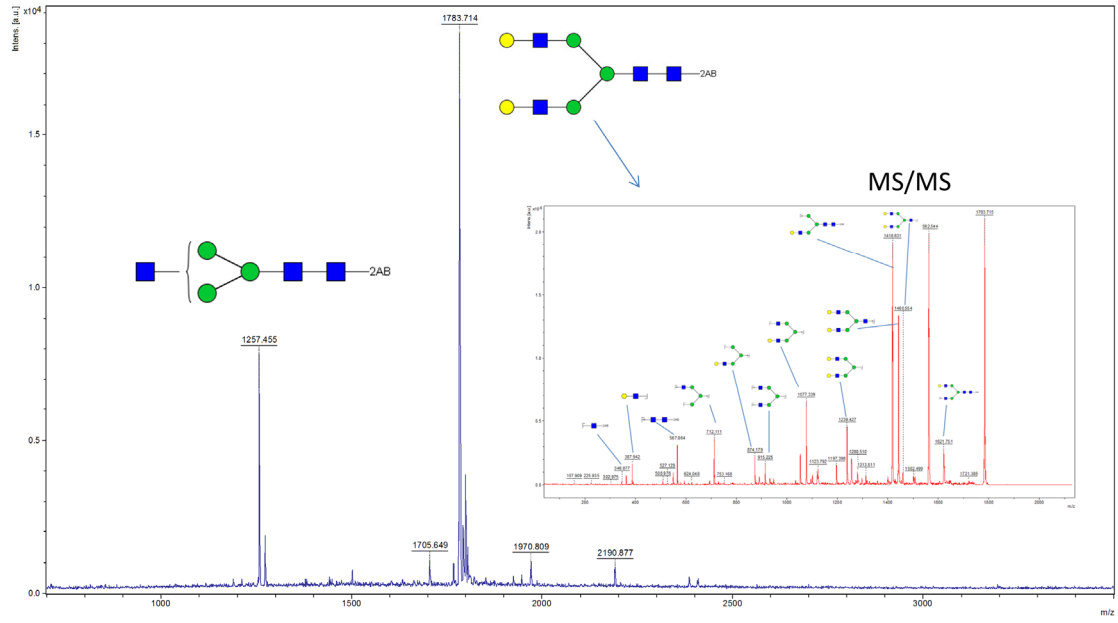

**Supplementary Figure 14** Mass spectrometric analysis of UPLC elution peak at 28.1 min.

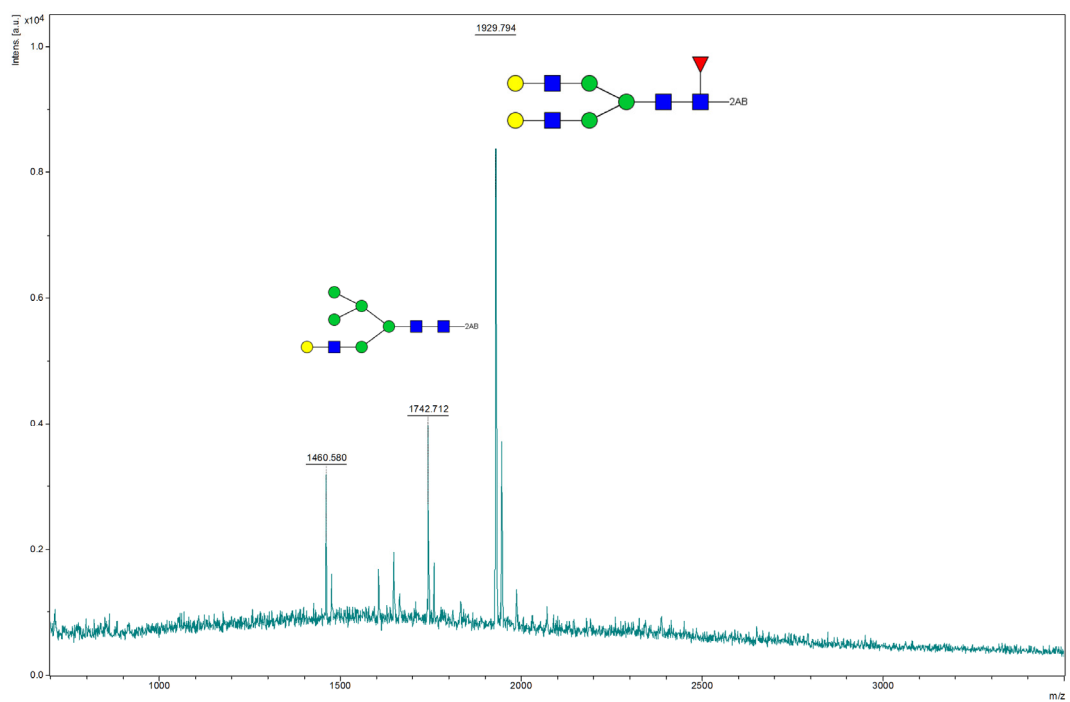

**Supplementary Figure 15** Mass spectrometric analysis of UPLC elution peak at 29.5 min.

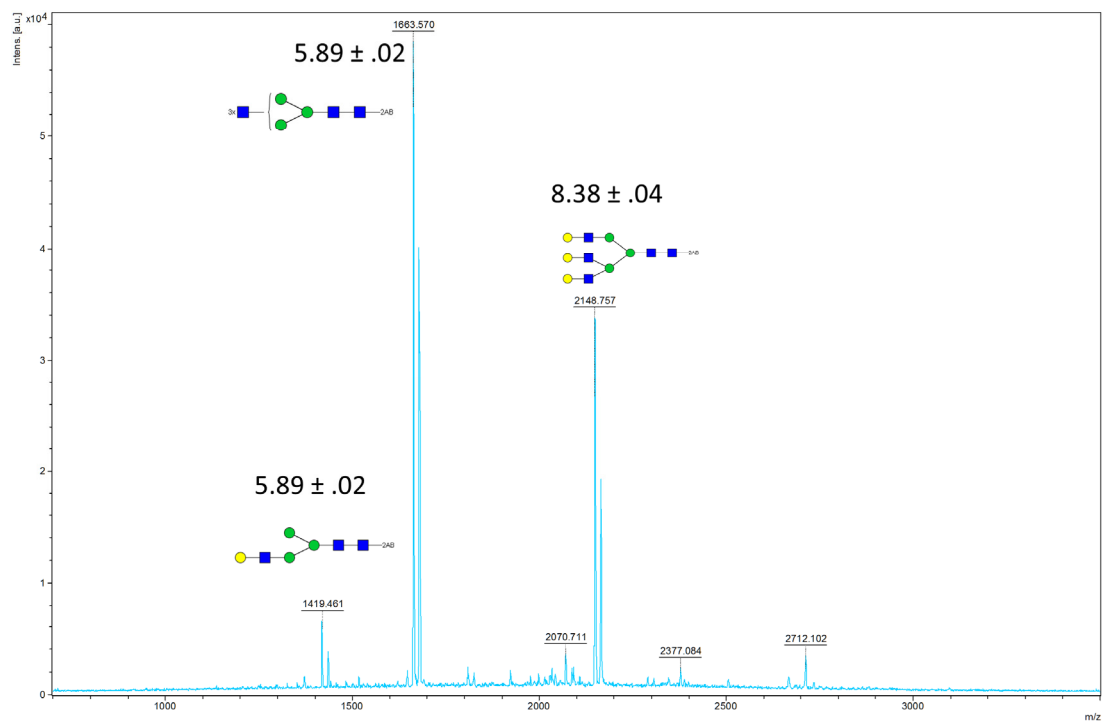

**Supplementary Figure 16** Mass spectrometric analysis of UPLC elution peak at 31.9 min.

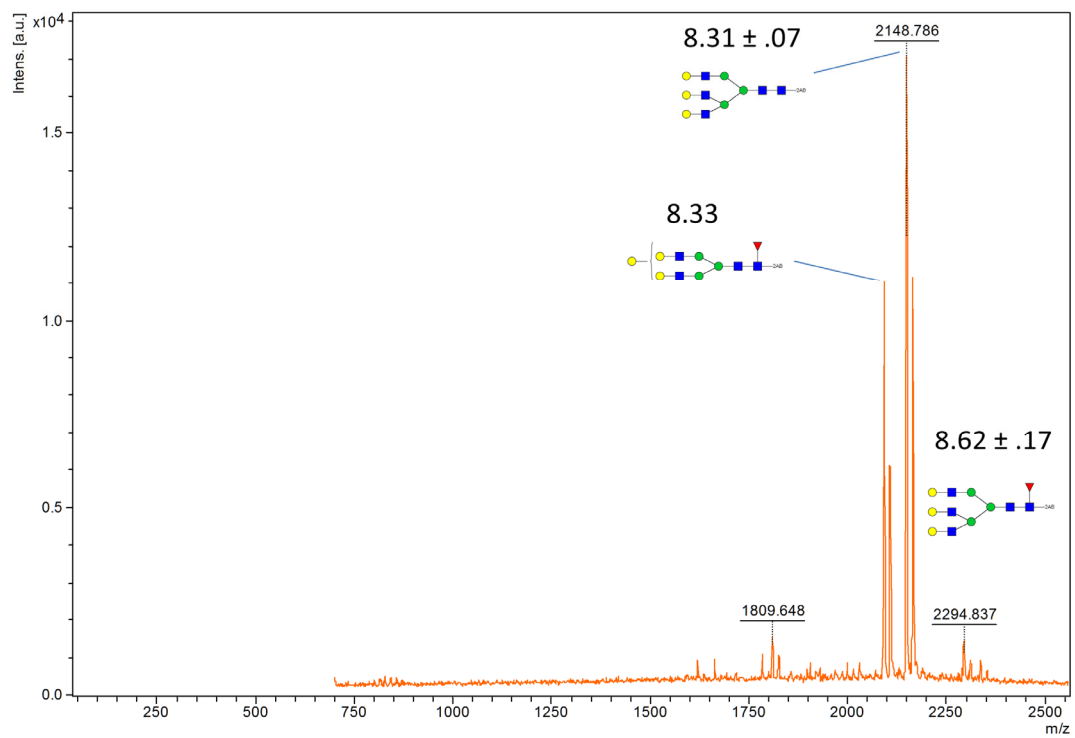

**Supplementary Figure 17** Mass spectrometric analysis of UPLC elution peak at 32.2 min.
